# Supplementary material for: Seasonal effect of PM2.5 exposure in patients with COPD: a multicentre panel study
Source: Royal Society of Chemistry journal article supplement (doi:10.1039/d4em00376d), 2025-01-01
Supplement: d4em00376d1.pdf [file d4em00376d1.pdf]

## **SUPPLEMENTARY INFORMATION**

### **Seasonal effect of PM<sub>2.5</sub> exposures in patients with COPD: a multicentre panel study**

Jin-Young Huh, Hajeong Kim, Shinhee Park, Seung Won Ra, Sung-Yoon Kang, Bock Hyun Jung, Mi Hye Kim, Sang Min Lee, Sang Pyo Lee, Dirga Kumar Lamichhane, Young-Jun Park, Jae Seung Lee, Yeon-Mok Oh, Hwan-Cheol Kim and Sei Won Lee

**Text S1.** Inclusion and exclusion criteria of the study

**PATIENT INCLUSION CRITERIA**

- i)  $\geq 40$  years of age,
- ii) Post-bronchodilator forced expiratory volume in one second (FEV<sub>1</sub>)/forced vital capacity  
 $< 0.7$
- iii) Predicted FEV<sub>1</sub>  $< 80\%$
- iv) Diagnosis of COPD by the attending physician

**PATIENT EXCLUSION CRITERIA**

- i) Absence of respiratory symptoms
- ii) Inability to understand the questionnaires and instructions for air sampler devices

**Table S1.** Seasonal indoor/outdoor ratio of PM<sub>2.5</sub>.

|                    | I/O ratio | <i>P</i> |
|--------------------|-----------|----------|
| Season             |           | <0.001   |
| Spring             | 0.918     |          |
| Summer             | 1.112     |          |
| Fall               | 1.059     |          |
| Winter             | 0.837     |          |
| Location           |           | 0.048    |
| Seoul              | 0.850     |          |
| Gangneung          | 1.046     |          |
| Inchon             | 1.249     |          |
| Ulsan              | 0.903     |          |
| Income             |           | 0.036    |
| High               | 0.856     |          |
| Low                | 1.031     |          |
| Economic status    |           | 0.009    |
| High               | 0.756     |          |
| Low                | 0.951     |          |
| Level of education |           | 0.006    |
| High               | 0.812     |          |
| Low                | 0.975     |          |

*Abbreviations:* I/O, indoor/outdoor ratio; PM<sub>2.5</sub>, particulate matter with aerodynamic size ≤ 2.5 μm

**Table S2.** Analysis of association between patient characteristics and indoor PM2.5 concentrations using a mixed-effect model.

|                               | Gradient | 95% Confidence Interval |         | <i>P</i> |
|-------------------------------|----------|-------------------------|---------|----------|
| Age                           | 0.212    | 0.002                   | 0.422   | 0.050    |
| Male                          | -1.030   | -6.559                  | 4.499   | 0.716    |
| Smoking status                |          |                         |         |          |
| Never smoker                  | -        | -                       | -       | -        |
| Former smoker                 | -2.315   | -6.494                  | 1.869   | 0.283    |
| Current smoker                | 0.269    | -4.853                  | 5.266   | 0.917    |
| Monthly household income, USD |          |                         |         |          |
| < \$875                       | -        | -                       | -       | -        |
| \$875 – \$1750                | -6.269   | -10.437                 | -2.1200 | 0.005    |
| \$1750 – \$3500               | -6.471   | -10.600                 | -2.342  | 0.003    |
| \$3500 – \$5250               | -6.125   | -11.964                 | -0.287  | 0.046    |
| \$5250 <                      | -6.645   | -12.751                 | -0.539  | 0.039    |
| Education                     |          |                         |         |          |
| ≤ Middle school graduation    | -        | -                       | -       | -        |
| High school graduation        | -2.267   | -5.916                  | 1.399   | 0.234    |
| College graduation            | -2.115   | -6.047                  | 2.288   | 0.334    |
| Post-graduate education       | -5.763   | -10.989                 | -0.138  | 0.042    |
| Economic status               |          |                         |         |          |
| Low                           | -        | -                       | -       | -        |
| Slightly below average        | -1.732   | -6.687                  | 3.298   | 0.512    |
| Average                       | -4.063   | -8.959                  | 0.812   | 0.113    |
| Slightly above average        | -5.321   | -11.782                 | 1.235   | 0.118    |
| High                          | -8.257   | -16.252                 | 0.524   | 0.057    |
| Seasons                       |          |                         |         |          |
| Spring                        | -        | -                       | -       | -        |
| Summer                        | -1.749   | -2.904                  | -0.593  | 0.003    |
| Fall                          | -3.739   | -4.887                  | -2.591  | <0.001   |
| Winter                        | -1.226   | -2.389                  | -0.064  | 0.040    |

*Abbreviations:* USD, United States dollar

**Table S3.** Analysis of association between patient characteristics and outdoor PM<sub>2.5</sub> concentrations using mixed-effect model.

|                               | Gradient | 95% Confidence Interval |        | <i>P</i> |
|-------------------------------|----------|-------------------------|--------|----------|
| Age                           | 0.030    | -0.017                  | 0.100  | 0.168    |
| Male                          | -0.366   | -1.9312                 | 1.558  | 0.640    |
| Smoking status                |          |                         |        |          |
| Never smoker                  | -        | -                       | -      | -        |
| Former smoker                 | -0.390   | -1.550                  | 0.797  | 0.515    |
| Current smoker                | -0.651   | -2.082                  | 0.828  | 0.379    |
| Monthly household income, USD |          |                         |        |          |
| < \$875                       | -        | -                       | -      | -        |
| \$875 – \$1750                | -2.332   | -3.568                  | -1.115 | <0.001   |
| \$1750 – \$3500               | -1.407   | -2.600                  | -0.211 | 0.022    |
| \$3500 – \$5250               | -1.282   | -2.958                  | 0.374  | 0.134    |
| \$5250 <                      | -1.466   | -3.178                  | 0.282  | 0.099    |
| Education                     |          |                         |        |          |
| ≤ Middle school graduation    | -        | -                       | -      | -        |
| High school graduation        | -0.995   | -2.038                  | 0.058  | 0.064    |
| College graduation            | -0.290   | -1.493                  | 0.943  | 0.641    |
| Post-graduate education       | -0.377   | -1.884                  | 1.154  | 0.627    |
| Economic status               |          |                         |        |          |
| Low                           | -        | -                       | -      | -        |
| Slightly below average        | -1.335   | -2.827                  | 0.178  | 0.083    |
| Average                       | -1.856   | -3.262                  | -0.433 | 0.011    |
| Slightly above average        | -1.721   | -3.591                  | 0.176  | 0.075    |
| High                          | -1.049   | -3.415                  | 1.379  | 0.392    |
| Seasons                       |          |                         |        |          |
| Spring                        | -        | -                       | -      | -        |
| Summer                        | -4.384   | -5.249                  | -3.519 | <0.001   |
| Fall                          | -6.862   | -7.719                  | -6.003 | <0.001   |
| Winter                        | -1.071   | -1.935                  | -0.207 | 0.016    |

*Abbreviations:* USD, United States dollar

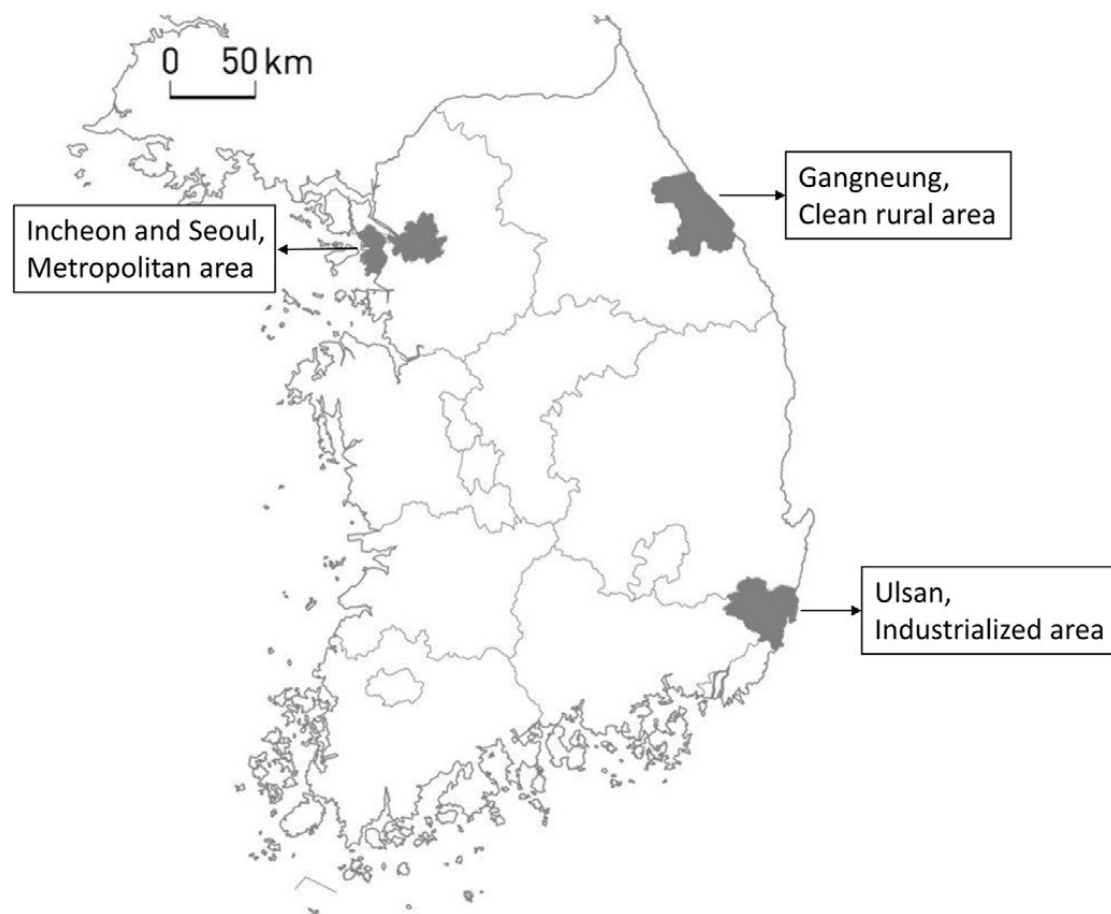

**Fig. S1.** Location of hospitals that participated in this study<sup>1</sup>

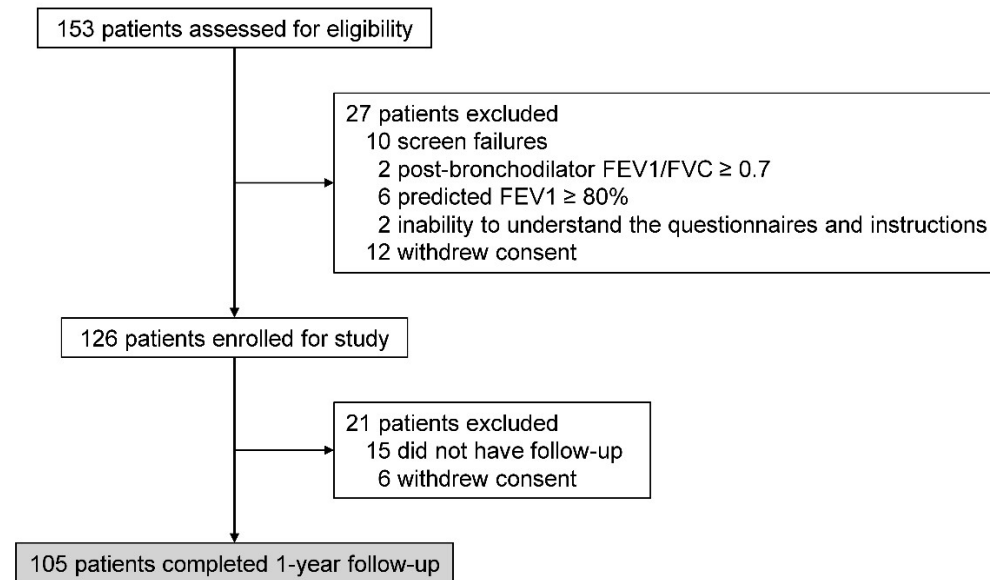

**Fig. S2.** Flow chart of the study.

*Abbreviations:* FEV<sub>1</sub>, forced expiratory volume in one second; FVC, forced vital capacity.

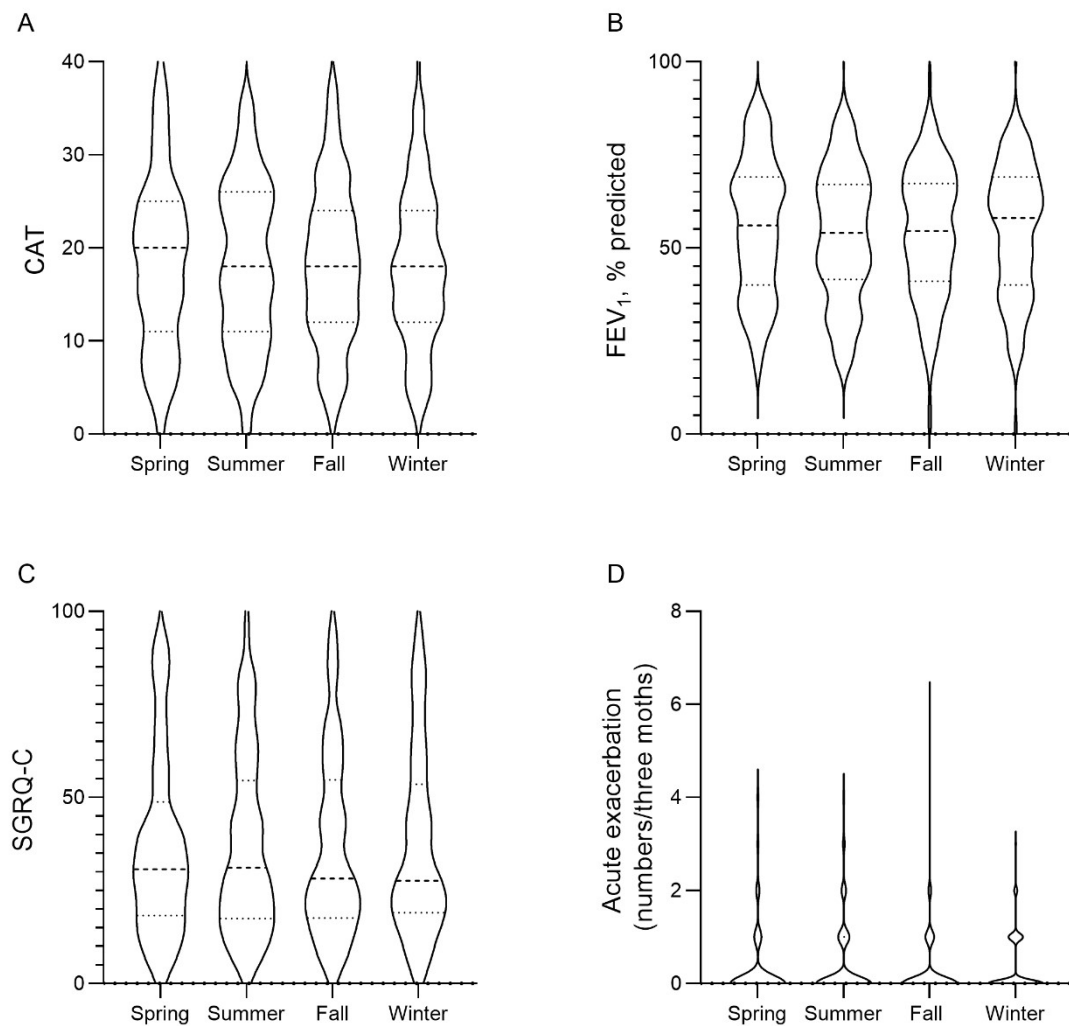

**Fig. S3.** Clinical outcomes in each season of the year.

The curves represent the probability density of the data at different values. The bold dotted line inside the curves illustrates the median, whereas paler dotted lines below and above the bold line are the first interquartile and the third interquartile range. (A) Mean of CAT scores. (B) FEV<sub>1</sub>, % prediction. (C) SGRQ-C scores. (D) Total number of acute exacerbations in the three months of each season.

*Abbreviations:* CAT, COPD assessment test; FEV<sub>1</sub>, forced expiratory volume in one second; SGRQ-C, Saint George's Respiratory Questionnaire for COPD



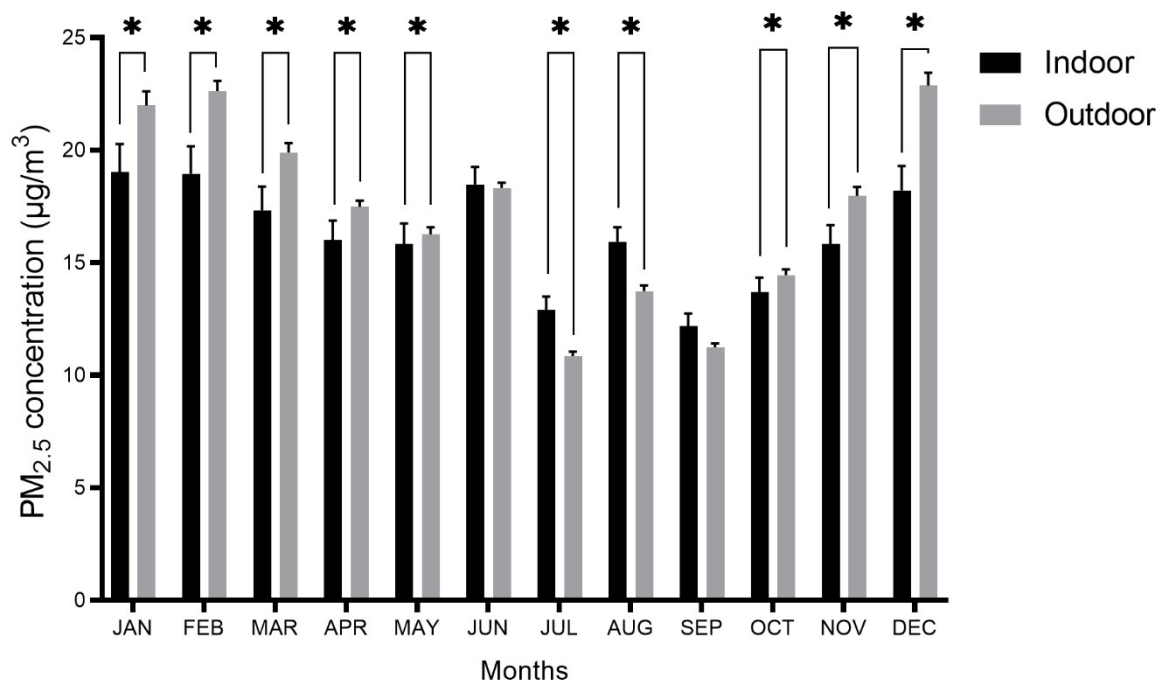

**Fig. S4.** Monthly mean concentration of PM<sub>2.5</sub> during the follow-up period.

Asterisks represent statistical significance of  $P < 0.05$ .

*Abbreviations:* PM<sub>2.5</sub>, particulate matter with aerodynamic size  $\leq 2.5 \mu\text{m}$

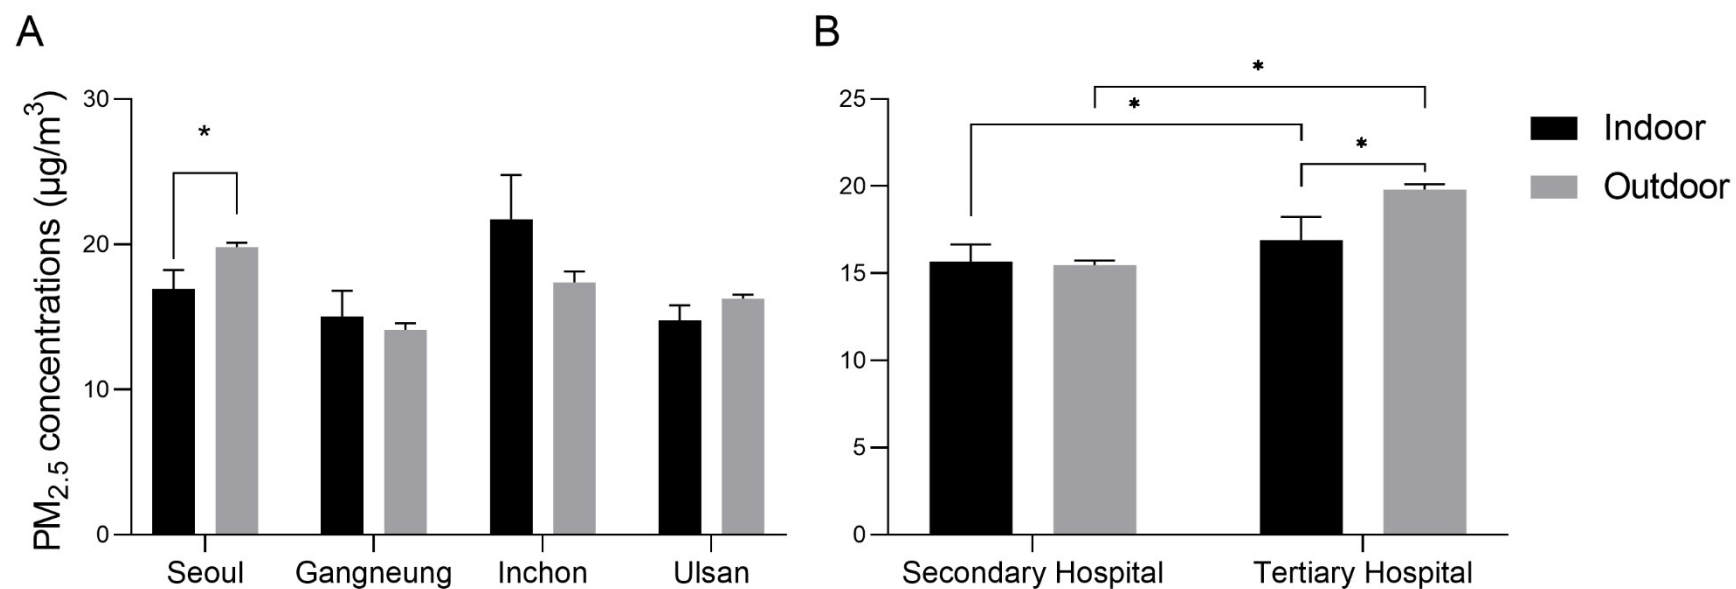

**Fig. S5.** Mean PM<sub>2.5</sub> in different locations.

(A) Mean individual PM<sub>2.5</sub> concentrations according to the location of the institution of each enrolled patient. (B) Mean individual PM<sub>2.5</sub> concentrations according to the referral status of the enrolled institution.

Asterisks represent statistical significance of  $P < 0.05$ .

*Abbreviations:* PM<sub>2.5</sub>, particulate matter with aerodynamic size  $\leq 2.5$  µm

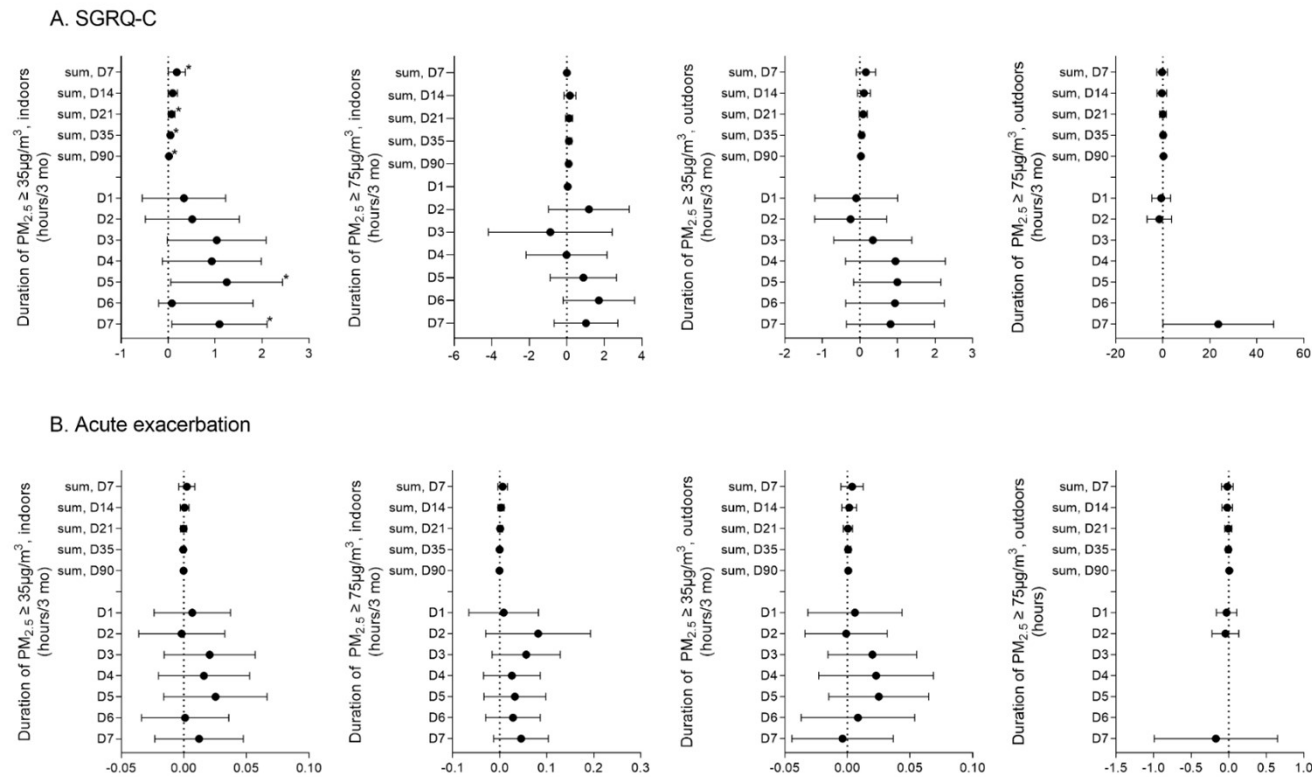

**Fig. S6.** Changes in SGRQ-C and acute exacerbations according to PM<sub>2.5</sub> concentrations, during spring.

The black circles represent the correlation between SGRQ-C score or number of acute exacerbations and PM<sub>2.5</sub> concentrations. The x-axis illustrates the linear regression coefficients. The y-axis displays the PM<sub>2.5</sub> concentrations of each day or sum of PM<sub>2.5</sub> concentrations during the days before clinical evaluation. (A) PM<sub>2.5</sub> and SGRQ-C. (B) PM<sub>2.5</sub> and numbers of acute exacerbation in three months.

Asterisks represent statistical significance of  $P < 0.05$ .

*Abbreviations:* PM<sub>2.5</sub>, particulate matter with aerodynamic size  $\leq 2.5 \mu\text{m}$ ; SGRQ-C, Saint George's Respiratory Questionnaire for COPD

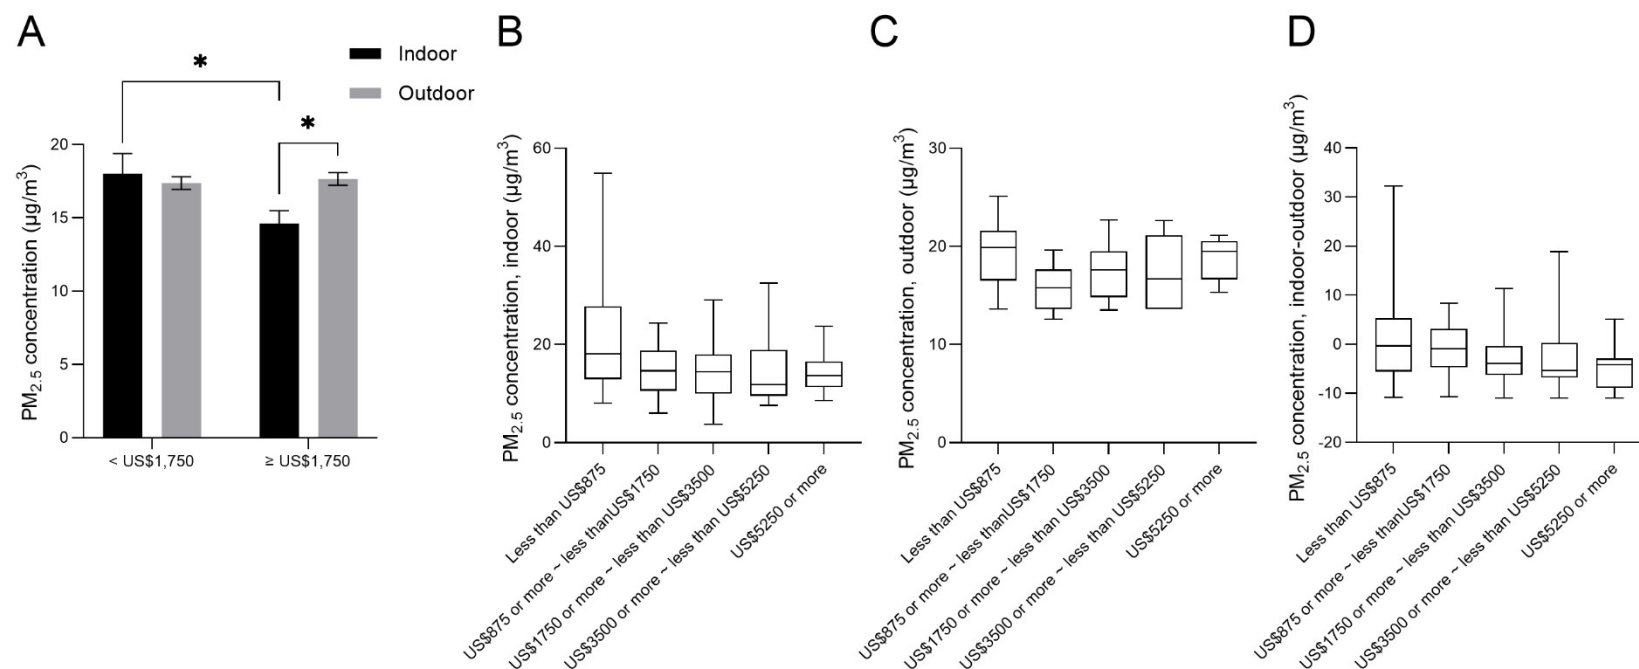

**Fig. S7.** Indoor and outdoor PM<sub>2.5</sub> concentrations in relation to participants' income status.

Participants were allocated to the low-income group if their monthly income was less than \$1,750 USD.

(A) Mean individual ambient PM<sub>2.5</sub> concentrations of high-, and low- income groups. (B) Indoor PM<sub>2.5</sub> concentrations among different income groups. (C) Outdoor PM<sub>2.5</sub> concentrations among different income groups. (D) Difference from indoor PM<sub>2.5</sub> concentration to outdoor PM<sub>2.5</sub> concentration among different income groups.

Asterisks represent statistical significance of  $P < 0.05$ .

*Abbreviations:* PM<sub>2.5</sub>, particulate matter with aerodynamic size  $\leq 2.5$  µm; USD, United States dollar

A. Low-income (< \$1,750)

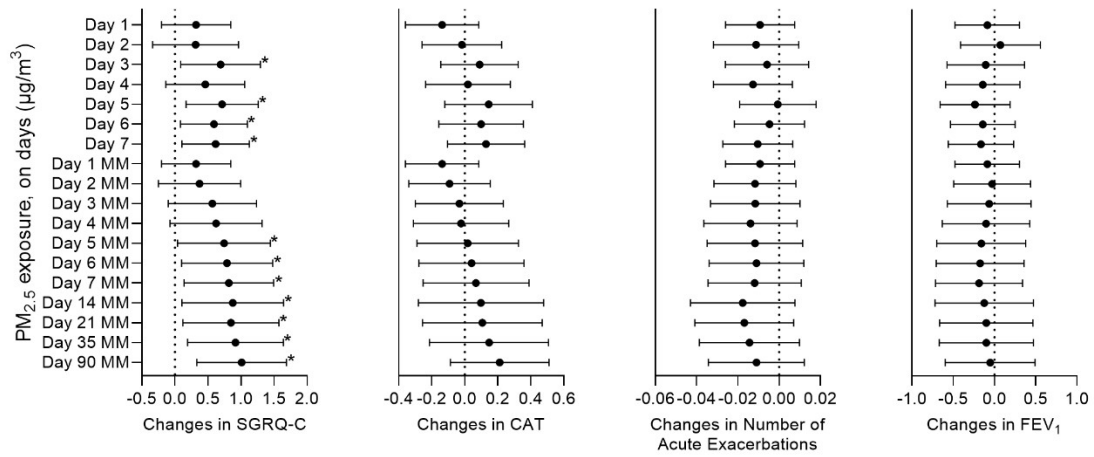

B. High-income ( $\geq$  \$1,750)

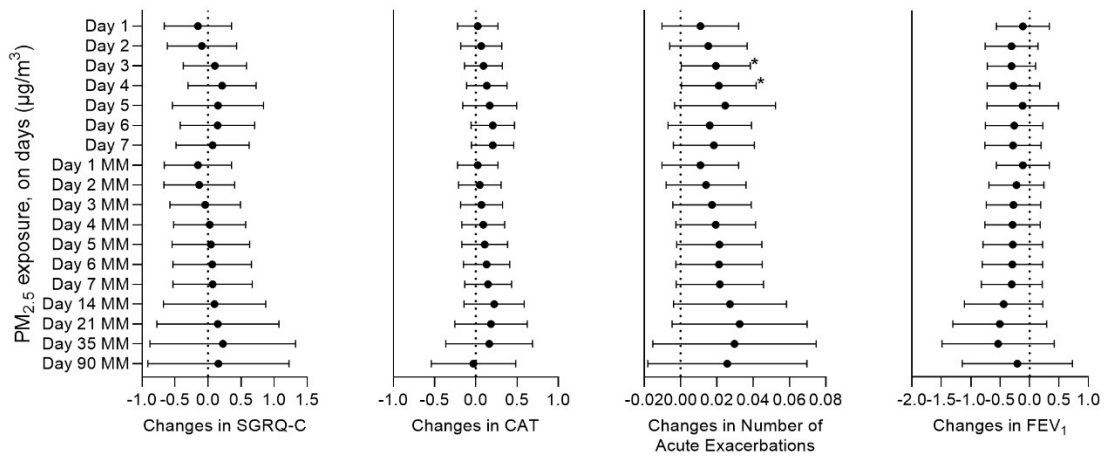

**Fig. S8.** Relationship between clinical outcomes and PM<sub>2.5</sub> concentrations according to income groups in spring.

(A) Changes of clinical parameters in low-income group. (B) Changes in clinical parameters in high-income group.

Asterisks represent statistical significance of  $P < 0.05$ .

*Abbreviations:* PM<sub>2.5</sub>, particulate matter with aerodynamic size  $\leq 2.5 \mu\text{m}$ ; MM, moving mean

## A. Low-income

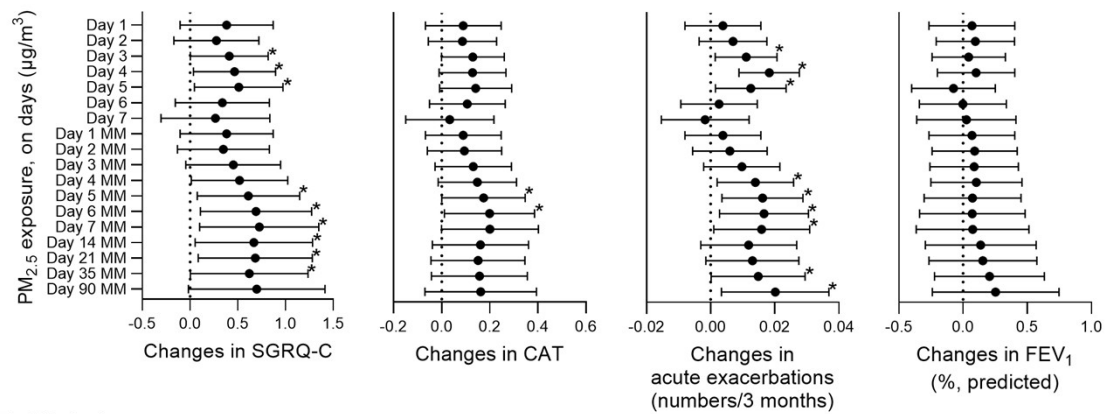

## B. High-income

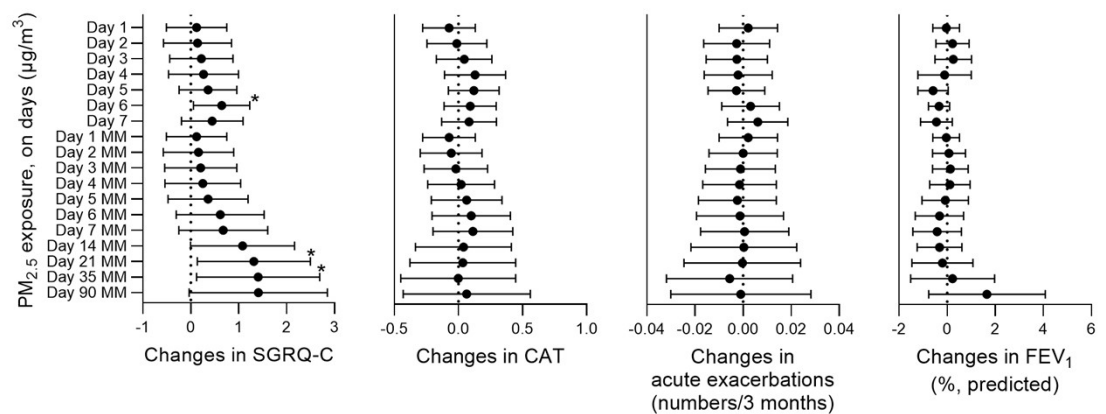

**Fig. S9.** Relationship between clinical outcomes and PM<sub>2.5</sub> concentrations according to income groups in winter.

(A) Changes of clinical parameters in the low-income group. (B) Changes in clinical parameters in the high-income group. Asterisks represent statistical significance of  $P < 0.05$ .

*Abbreviations:* PM<sub>2.5</sub>, particulate matter with aerodynamic size  $\leq 2.5 \mu\text{m}$ ; MM, moving mean

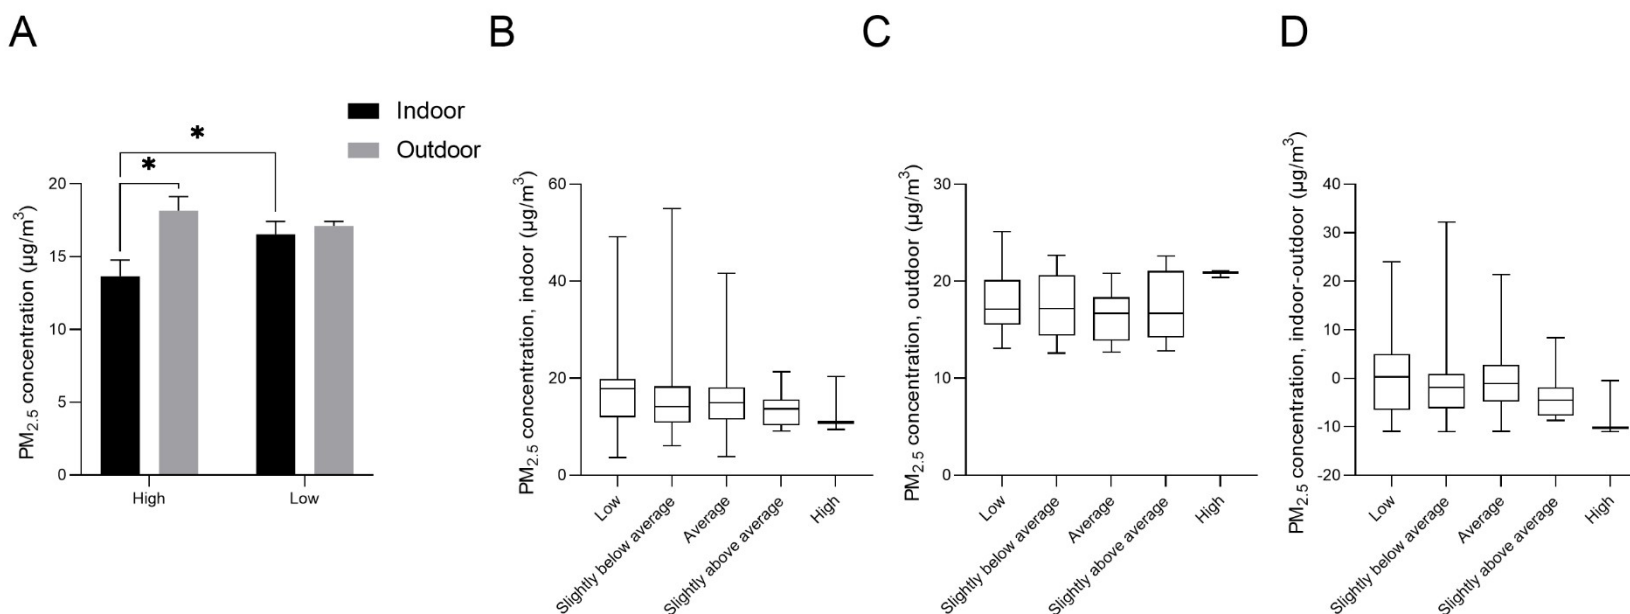

**Fig. S10.** Indoor and outdoor PM<sub>2.5</sub> concentrations in relation to participants' economic status groups.

Participants were allocated to the high-economic status group if they answered their economic status to be high or very high in the questionnaire.

(A) Mean individual ambient PM<sub>2.5</sub> concentrations of high-, and low- economic status groups. (B) Boxplot of indoor PM<sub>2.5</sub> concentrations among different economic status groups. (C) Boxplot of outdoor PM<sub>2.5</sub> concentrations among different economic status groups. (D) Difference from indoor PM<sub>2.5</sub> concentration to outdoor PM<sub>2.5</sub> concentration among different economic status groups.

Asterisks represent statistical significance of  $P < 0.05$ .

*Abbreviations:* PM<sub>2.5</sub>, particulate matter with aerodynamic size  $\leq 2.5 \mu\text{m}$

### A. Low-economic status

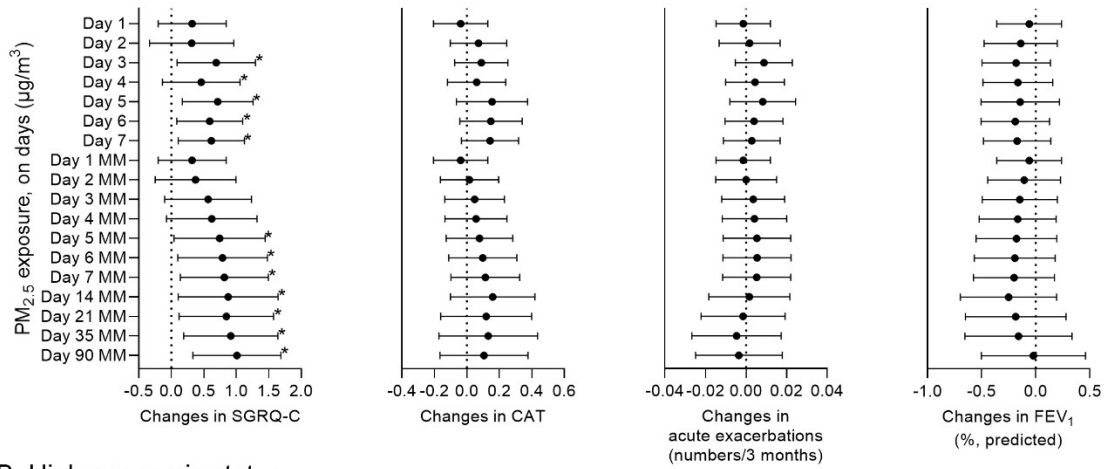

### B. High-economic status

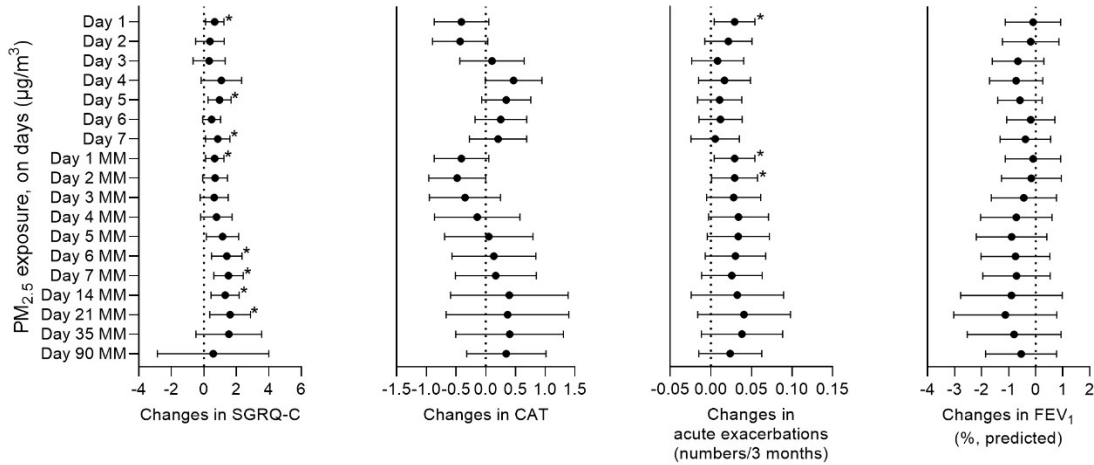

**Fig. S11.** Relationship between clinical outcomes and  $PM_{2.5}$  concentrations according to economic status groups in spring.

(A) Changes of clinical parameters in the low-economic status group. (B) Changes in clinical parameters in the high-economic status group.

Asterisks represent statistical significance of  $P < 0.05$ .

*Abbreviations:*  $PM_{2.5}$ , particulate matter with aerodynamic size  $\leq 2.5 \mu m$ ; MM, moving mean



### A. Low-economic status

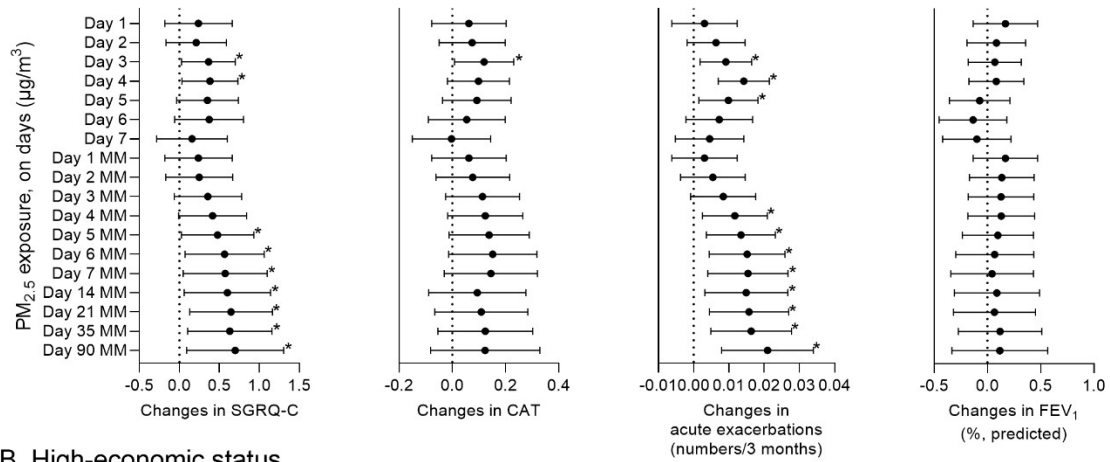

### B. High-economic status

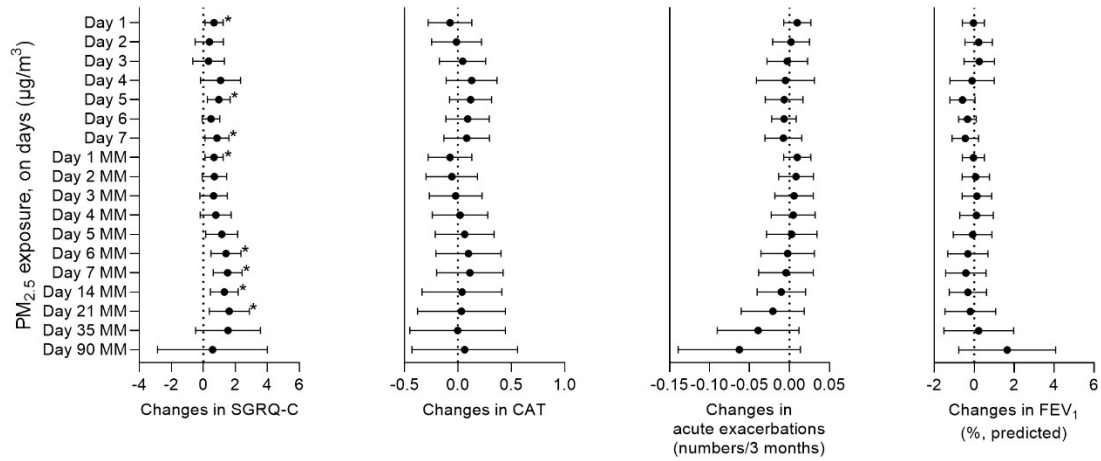

**Fig. S12.** Relationship between clinical outcomes and  $PM_{2.5}$  concentrations according to economic status groups in winter.

(A) Changes of clinical parameters in the low-economic status group. (B) Changes in clinical parameters in the high-economic status group.

Asterisks represent statistical significance of  $P < 0.05$ .

*Abbreviations:*  $PM_{2.5}$ , particulate matter with aerodynamic size  $\leq 2.5 \mu m$ ; MM, moving mean

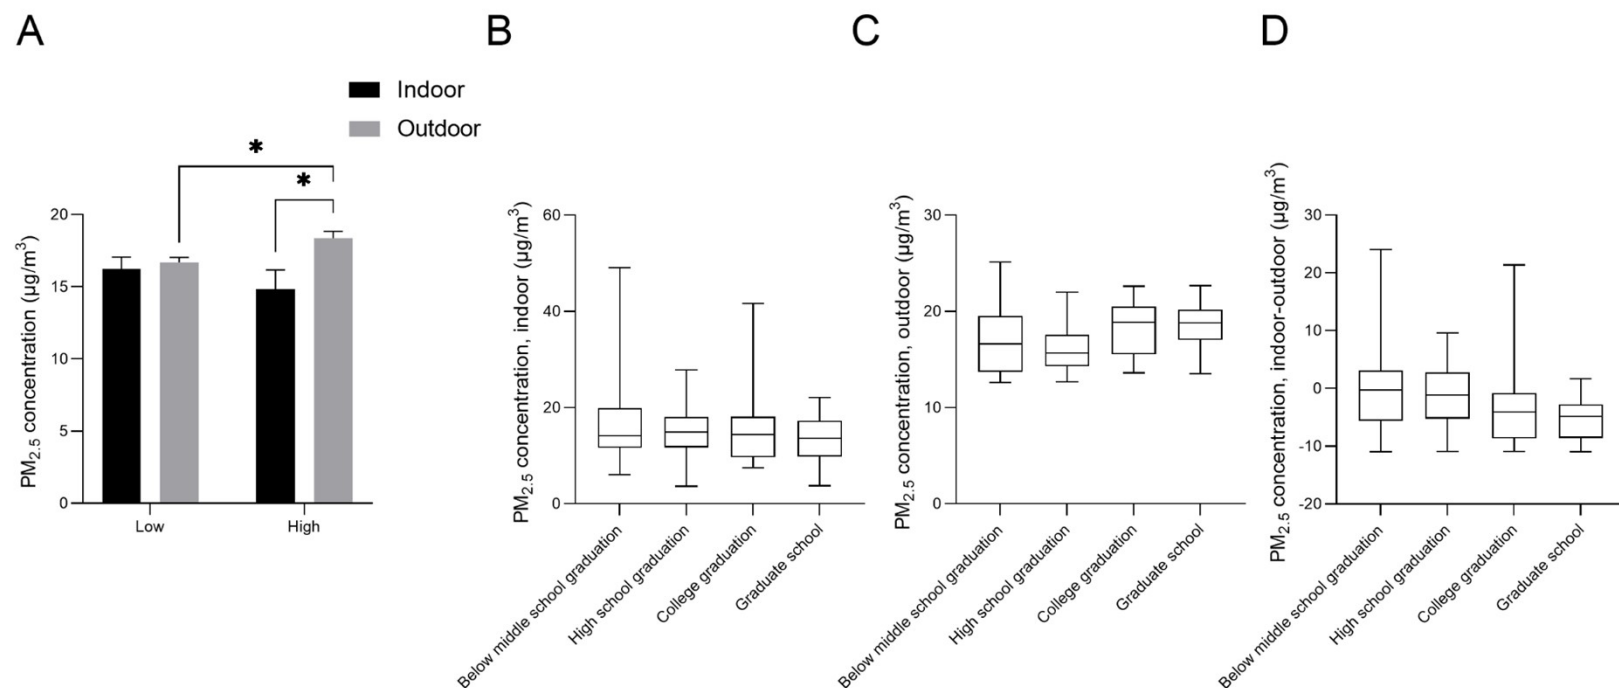

1

2 **Fig. S13.** Indoor and outdoor PM<sub>2.5</sub> concentrations in relation to participants' educational status groups.

3 Participants were allocated to the high-education group if they graduated college or had any higher education.

4 (A) Mean individual ambient PM<sub>2.5</sub> concentrations of high-, and low- educational achievement groups. (B) Boxplot of indoor PM<sub>2.5</sub>  
 5 concentrations among different education groups. (C) Boxplot of outdoor PM<sub>2.5</sub> concentrations among different education groups. (D)  
 6 Difference from indoor PM<sub>2.5</sub> concentration to outdoor PM<sub>2.5</sub> concentration among different education groups.

7 Asterisks represent statistical significance of  $P < 0.05$ .

8 *Abbreviations:* PM<sub>2.5</sub>, particulate matter with aerodynamic size  $\leq 2.5$  µm

### A. Low-education

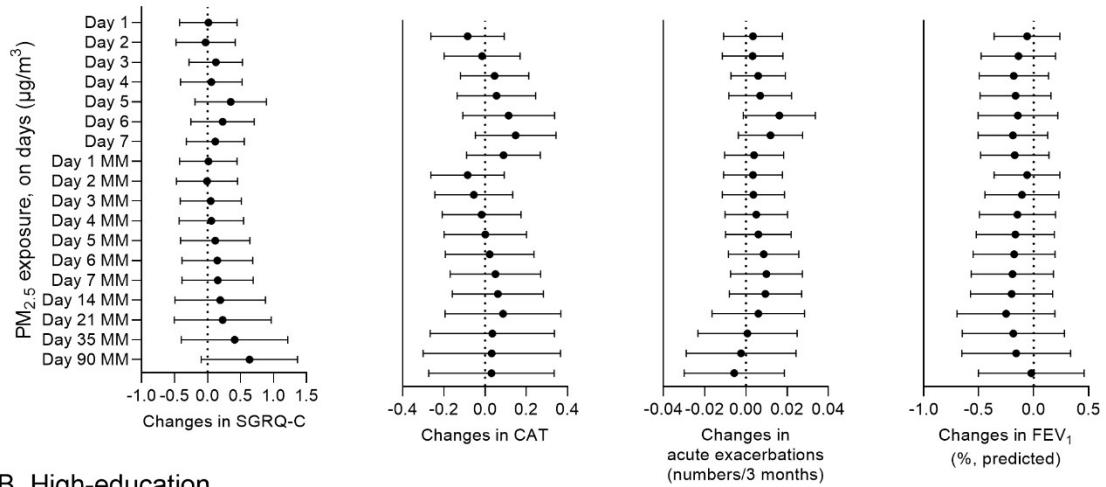

### B. High-education

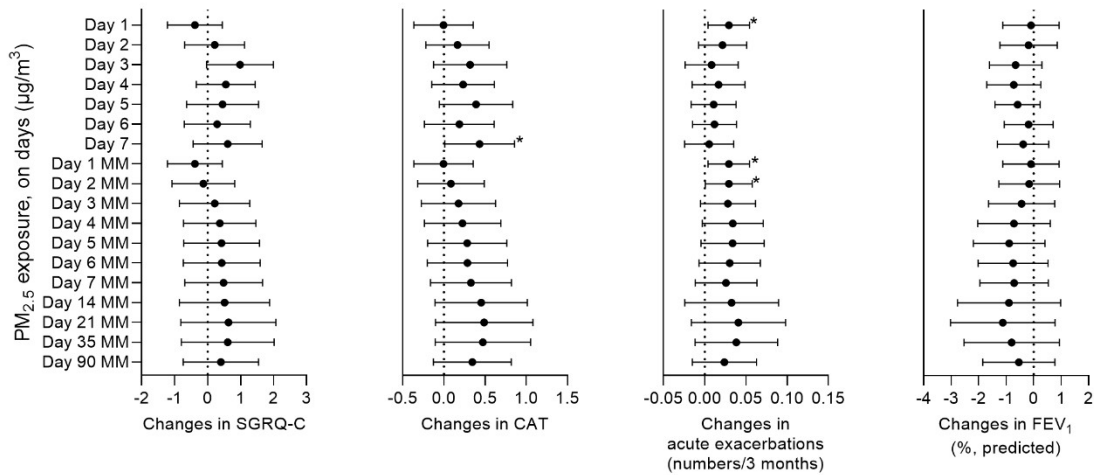

**Fig. S14.** Relationship between clinical outcomes and PM<sub>2.5</sub> concentrations according to educational status groups in spring.

(A) Changes of clinical parameters in the low-educational achievement group. (B) Changes in clinical parameters in the high-educational achievement group.

Asterisks represent statistical significance of  $P < 0.05$ .

*Abbreviations:* PM<sub>2.5</sub>, particulate matter with aerodynamic size  $\leq 2.5$   $\mu\text{m}$ ; MM, moving mean

### A. Low-education

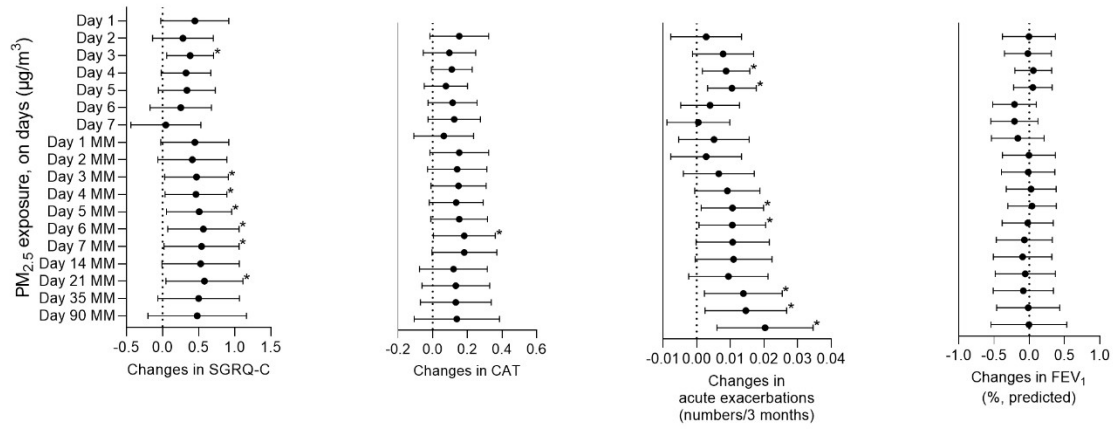

### B. High-education

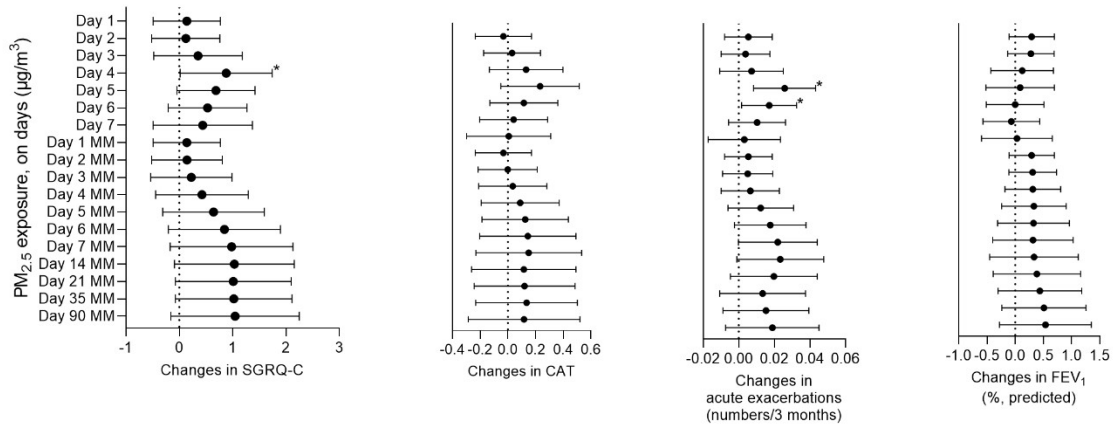

**Fig. S15.** Relationship between clinical outcomes and  $PM_{2.5}$  concentrations according to educational status groups in winter.

(A) Changes of clinical parameters in the low-educational achievement group. (B) Changes in clinical parameters in the high-educational achievement group.

Asterisks represent statistical significance of  $P < 0.05$ .

**Abbreviations:**  $PM_{2.5}$ , particulate matter with aerodynamic size  $\leq 2.5 \mu m$ ; MM moving mean

1. S. Park, S. W. Ra, S. Y. Kang, H. C. Kim and S. W. Lee, Effect of particulate matter exposure on patients with COPD and risk reduction through behavioural interventions: the protocol of a prospective panel study, *BMJ Open*, 2020, **10**, e039394.
